# Supplementary material for: Trichomonosis in Austrian Songbirds—Geographic Distribution, Pathological Lesions and Genetic Characterization over Nine Years
Source: MDPI journal article supplement (doi:10.3390/ani12101306), 2022-05-19
Supplement: s1 [file s1]

**Table S1.** Postmortem findings and results of laboratory examinations of 88 adult wild birds of the order Passeriformes, from 2012 to 2020 in Austria.

| Species    | Location            | Date found | Sex/<br>Age | Body<br>Condition | Weight<br>(g) | Crop<br>lesions | Detection<br>method | GenBank accession numbers |                             |
|------------|---------------------|------------|-------------|-------------------|---------------|-----------------|---------------------|---------------------------|-----------------------------|
|            |                     |            |             |                   |               |                 |                     | ITS1-5.8S-<br>ITS2        | Fe-<br>Hydrogenase-<br>gene |
| Greenfinch | Hartkirchen (UA)    | 10.05.2012 | F/A         | emaciated         | 20            | +               | ISH/PCR             | ND                        | ND                          |
| Greenfinch | Hartkirchen (UA)    | 10.05.2012 | M/A         | emaciated         | 18            | +               | ISH/PCR             | ND                        | ND                          |
| Greenfinch | Hartkirchen (UA)    | 10.05.2012 | F/A         | emaciated         | 18            | +               | ISH/PCR             | ND                        | ND                          |
| Greenfinch | Hartkirchen (UA)    | 10.05.2012 | F/A         | emaciated         | 20            | +               | ISH/PCR             | ND                        | ND                          |
| Greenfinch | Graz (St)           | 16.05.2012 | x           | emaciated         | 16            | +               | ISH/PCR             | ND                        | ND                          |
| Greenfinch | Graz (St)           | 16.05.2012 | x           | emaciated         | 18            | +               | ISH/PCR             | ND                        | ND                          |
| Great tit  | Graz (St)           | 16.05.2012 | x           | moderate          | 16            | +               | ISH/PCR             | ND                        | ND                          |
| Great tit  | Graz (St)           | 16.05.2012 | x           | moderate          | 16            | +               | ISH/PCR             | ND                        | ND                          |
| Greenfinch | Jennersdorf (B)     | 01.06.2012 | M/A         | emaciated         | 22            | +               | ISH/PCR             | Ganas et al. (2014)       |                             |
| Greenfinch | Matzen (LA)         | 01.06.2012 | F/A         | emaciated         | 22            | +               | ISH/PCR             | ND                        | ND                          |
| Greenfinch | Matzen (LA)         | 01.06.2012 | F/A         | emaciated         | 18            | +               | ISH/PCR             | ND                        | ND                          |
| Greenfinch | Dornbirn (V)        | 28.06.2012 | M/A         | emaciated         | 16            | +               | ISH/PCR             | ND                        | ND                          |
| Greenfinch | Villach (C)         | 28.06.2012 | x           | x                 | x             | +               | ISH/PCR             | ND                        | ND                          |
| Greenfinch | Siegenfeld (LA)     | 25.07.2012 | F/A         | emaciated         | 18            | +               | ISH/PCR             | Ganas et al. (2014)       |                             |
| Greenfinch | Siegenfeld (LA)     | 25.07.2012 | F/A         | emaciated         | 20            | +               | ISH/PCR             | ND                        | ND                          |
| Greenfinch | Siegenfeld (LA)     | 25.07.2012 | M/A         | emaciated         | 20            | +               | ISH/PCR             | ND                        | ND                          |
| Greenfinch | Siegenfeld (LA)     | 25.07.2012 | F/A         | emaciated         | 22            | +               | ISH/PCR             | ND                        | ND                          |
| Greenfinch | Seefeld-Kadolz (LA) | 30.05.2014 | M/A         | emaciated         | 16            | +               | ISH/PCR             | ND                        | ND                          |
| Greenfinch | Seefeld-Kadolz (LA) | 30.05.2014 | M/A         | emaciated         | 18            | +               | ISH/PCR             | ND                        | ND                          |
| Greenfinch | Seefeld-Kadolz (LA) | 30.05.2014 | M/A         | emaciated         | 18            | +               | ISH/PCR             | ND                        | ND                          |
| Greenfinch | Seefeld-Kadolz (LA) | 30.05.2014 | M/A         | emaciated         | 22            | +               | ISH/PCR             | ND                        | ND                          |
| Greenfinch | Seefeld-Kadolz (LA) | 30.05.2014 | M/A         | emaciated         | 16            | +               | ISH/PCR             | ND                        | ND                          |
| Greenfinch | Seefeld-Kadolz (LA) | 30.05.2014 | M/A         | emaciated         | 20            | +               | ISH/PCR             | ND                        | ND                          |
| Greenfinch | Neufeld/L (LA)      | 03.08.2015 | F/A         | emaciated         | 18            | +               | ISH/PCR             | ND                        | ND                          |
| Greenfinch | Gmünd (LA)          | 14.08.2015 | F/A         | emaciated         | 20            | +               | ISH/PCR             | ND                        | ND                          |
| Bullfinch  | Dornbirn (V)        | 22.06.2016 | x           | emaciated         | 20            | +               | ISH/PCR             | ND                        | ND                          |
| Greenfinch | Sommerein (LA)      | 04.07.2016 | M/A         | emaciated         | 24            | +               | ISH/PCR             | ND                        | ND                          |
| Greenfinch | Neunkirchen (LA)    | 01.09.2016 | M/A         | x                 | x             | +               | ISH/PCR             | ND                        | ND                          |
| Greenfinch | Baden (LA)          | 25.10.2016 | M/A         | emaciated         | 20            | +               | ISH/PCR             | ND                        | ND                          |
| Greenfinch | Lustenau (V)        | 25.10.2016 | M/A         | emaciated         | 18            | +               | ISH/PCR             | ND                        | ND                          |
| Greenfinch | Lustenau (V)        | 25.10.2016 | M/A         | emaciated         | 25            | +               | ISH/PCR             | ND                        | ND                          |
| Greenfinch | Götzis (V)          | 25.10.2016 | M/A         | emaciated         | 16            | +               | ISH/PCR             | ND                        | ND                          |
| Greenfinch | Lustenau (V)        | 25.10.2016 | M/A         | emaciated         | 20            | +               | ISH/PCR             | ND                        | ND                          |

| Species         | Location           | Date found | Sex/<br>Age | Body<br>Condition | Weight<br>(g) | Crop<br>lesions | Detection<br>method | ITS1-5.8S-<br>ITS2 | Fe-<br>Hydrogenase-<br>gene |
|-----------------|--------------------|------------|-------------|-------------------|---------------|-----------------|---------------------|--------------------|-----------------------------|
| Greenfinch      | Brunnenthal (UA)   | 12.07.2017 | x           | emaciated         | 20            | +               | ISH/PCR             | ND                 | ND                          |
| Greenfinch      | Neumarkt (UA)      | 21.07.2017 | x           | x                 | x             | 0               | PCR                 | ND                 | ND                          |
| Greenfinch      | Neumarkt (UA)      | 21.07.2017 | x           | x                 | x             | +               | ISH/PCR             | OL678475           | OL654280                    |
| Greenfinch      | Neumarkt (UA)      | 21.07.2017 | x           | x                 | x             | +               | ISH/PCR             | ND                 | ND                          |
| Great tit       | Graz (St)          | 24.07.2017 | x           | emaciated         | 14            | +               | ISH/PCR             | OL678476           | OL654281                    |
| Greenfinch      | Schwarzenberg (UA) | 11.08.2017 | M/A         | emaciated         | 18            | +               | ISH/PCR             | OL678477           | ND                          |
| Greenfinch      | Schwarzenberg (UA) | 11.08.2017 | M/A         | emaciated         | 20            | +               | ISH/PCR             | ND                 | ND                          |
| Greenfinch      | Schwarzenberg (UA) | 11.08.2017 | M/A         | emaciated         | 22            | +               | ISH/PCR             | ND                 | ND                          |
| Great tit       | Strasshof (LA)     | 17.08.2017 | F/A         | emaciated         | 12            | 0               | PCR                 | ND                 | ND                          |
| Greenfinch      | Schwarzenberg (UA) | 04.09.2017 | x           | emaciated         | 22            | +               | ISH/PCR             | ND                 | ND                          |
| Eurasian Siskin | Vienna             | 15.09.2017 | M/A         | emaciated         | 12            | +               | ISH/PCR             | OL678478           | OL654282                    |
| Yellowhammer    | Altenmarkt (St)    | 07.03.2018 | M/A         | emaciated         | 25            | +               | ISH/PCR             | OL678479           | OL654283                    |
| Greenfinch      | Ilz (St)           | 26.06.2018 | M/A         | poor              | 26            | +               | ISH/PCR             | ND                 | ND                          |
| Hawfinch        | Hohenau (LA)       | 05.07.2018 | x           | emaciated         | 42            | +               | ISH/PCR             | OL678480           | OL654284                    |
| Hawfinch        | Hohenau (LA)       | 05.07.2018 | x           | emaciated         | 36            | +               | ISH/PCR             | OL678481           | OL654285                    |
| Greenfinch      | Althofen (C)       | 06.07.2018 | M/A         | emaciated         | 18            | +               | ISH/PCR             | OL678482           | OL654286                    |
| Greenfinch      | Schattendorf (B)   | 10.07.2018 | x           | emaciated         | 20            | +               | ISH/PCR             | OL678483           | OL654287                    |
| Greenfinch      | Vienna             | 31.07.2018 | x           | emaciated         | 20            | +               | ISH/PCR             | ND                 | ND                          |
| Greenfinch      | Kirchberg (UA)     | 07.08.2018 | x           | emaciated         | 22            | +               | ISH/PCR             | OL678484           | ND                          |
| Greenfinch      | Lanzenkirchen (LA) | 16.08.2018 | M/A         | emaciated         | 18            | +               | ISH/PCR             | ND                 | ND                          |
| Goldfinch       | Lanzenkirchen (LA) | 16.08.2018 | M/A         | good              | 16            | +               | ISH/PCR             | OL678485           | OL654288                    |
| Greenfinch      | Götzendorf (LA)    | 16.08.2018 | M/A         | emaciated         | 20            | +               | ISH/PCR             | ND                 | ND                          |
| Greenfinch      | Loosdorf (LA)      | 16.08.2018 | M/A         | emaciated         | 24            | +               | ISH/PCR             | ND                 | ND                          |
| Greenfinch      | Loosdorf (LA)      | 16.08.2018 | M/A         | poor              | 26            | +               | ISH/PCR             | ND                 | ND                          |
| Chaffinch       | Loosdorf (LA)      | 16.08.2018 | x           | good              | 24            | +               | ISH/PCR             | OL678486           | ND                          |
| Chaffinch       | Loosdorf (LA)      | 16.08.2018 | x           | poor              | 18            | +               | ISH/PCR             | OL678487           | OL654289                    |
| Goldfinch       | Vösendorf (LA)     | 22.08.2018 | M/A         | emaciated         | 12            | +               | ISH/PCR             | OL678488           | OL654290                    |
| Greenfinch      | Hart b. Graz (St)  | 23.08.2018 | x           | emaciated         | 16            | +               | ISH/PCR             | OL678489           | OL654291                    |
| Chaffinch       | Röthis (V)         | 29.09.2018 | M/A         | good              | 22            | +               | ISH/PCR             | OL678490           | OL654291                    |

| Species         | Location                | Date found | Sex/<br>Age | Body<br>Condition | Weight<br>(g) | Crop<br>lesions | Detection<br>method | ITS1-5.8S-<br>ITS2 | Fe-<br>Hydrogenase-<br>gene |
|-----------------|-------------------------|------------|-------------|-------------------|---------------|-----------------|---------------------|--------------------|-----------------------------|
| Greenfinch      | Maria Alm (S)           | 25.01.2019 | M/A         | emaciated         | 18            | +               | ISH/PCR             | OL678491           | OL654292                    |
| Yellowhammer    | Yspertal (LA)           | 01.02.2019 | M/A         | emaciated         | 20            | +               | ISH/PCR             | OL678492           | OL654293                    |
| Greenfinch      | Loosdorf (LA)           | 05.02.2019 | M/A         | emaciated         | 10            | +               | ISH/PCR             | OL678493           | OL654294                    |
| Chaffinch       | Güssing (B)             | 13.03.2019 | M/A         | good              | 22            | +               | ISH/PCR             | OL678494           | OL654295                    |
| Greenfinch      | Kleinbaumgarten (LA)    | 23.07.2019 | M/A         | emaciated         | 18            | +               | ISH/PCR             | ND                 | ND                          |
| Greenfinch      | Bergheim (S)            | 31.07.2019 | x           | emaciated         | 16            | +               | ISH/PCR             | OL678495           | OL654296                    |
| Greenfinch      | Wallern (B)             | 13.08.2019 | x           | emaciated         | 14            | +               | ISH/PCR             | OL678496           | ND                          |
| Greenfinch      | Wallern (B)             | 13.08.2019 | x           | emaciated         | 14            | +               | ISH/PCR             | ND                 | ND                          |
| Greenfinch      | Wallern (B)             | 13.08.2019 | x           | emaciated         | 18            | +               | ISH/PCR             | ND                 | ND                          |
| Chaffinch       | Steyr (UA)              | 23.03.2019 | x           | emaciated         | 15            | +               | ISH/PCR             | ND                 | ND                          |
| Greenfinch      | Dornbirn (V)            | 15.10.2019 | M/A         | emaciated         | 19            | +               | ISH/PCR             | OL678497           | OL654297                    |
| Greenfinch      | Dornbirn (V)            | 15.10.2019 | M/A         | emaciated         | 24            | +               | ISH/PCR             | ND                 | ND                          |
| Goldfinch       | Loosdorf (LA)           | 24.01.2020 | x           | emaciated         | 13            | +               | ISH/PCR             | OL678498           | OL654298                    |
| Brambling       | Loosdorf (LA)           | 24.01.2020 | x           | emaciated         | 16            | +               | ISH/PCR             | OL678499           | OL654299                    |
| Eurasian Siskin | Herzogsdorf (UA)        | 28.01.2020 | M/A         | emaciated         | 11            | +               | ISH/PCR             | OL678500           | OL654300                    |
| Chaffinch       | St. Andrä-Höch (St)     | 13.02.2020 | x           | good              | 20            | +               | ISH/PCR             | OL678501           | ND                          |
| Brambling       | St. Andrä-Höch (St)     | 13.02.2020 | x           | emaciated         | 15            | +               | ISH/PCR             | OL678502           | ND                          |
| Goldfinch       | Nappersdorf (LA)        | 13.03.2020 | M/A         | emaciated         | 13            | +               | ISH/PCR             | ND                 | ND                          |
| Bullfinch       | Bad Gastein (S)         | 26.06.2020 | M/A         | good              | 25            | +               | ISH/PCR             | ND                 | ND                          |
| Goldfinch       | Leopoldsdorf (LA)       | 03.07.2020 | M/A         | emaciated         | 14            | +               | ISH/PCR             | OL678503           | OL654301                    |
| Greenfinch      | Leopoldsdorf (LA)       | 03.07.2020 | F/A         | emaciated         | 19            | +               | ISH/PCR             | OL678504           | OL654302                    |
| Greenfinch      | Manhartsbrunn (LA)      | 06.07.2020 | M/A         | emaciated         | 20            | +               | ISH/PCR             | ND                 | ND                          |
| Bullfinch       | Aurach b. Kitzbühel (T) | 04.08.2020 | x           | emaciated         | 18            | +               | ISH/PCR             | OL678505           | OL654303                    |
| Hawfinch        | Grub (LA)               | 17.08.2020 | F/A         | emaciated         | 39            | +               | ISH/PCR             | OL678506           | OL654304                    |
| Great tit       | Mischendorf (B)         | 27.08.2020 | x           | x                 | x             | +               | ISH/PCR             | OL678507           | ND                          |
| Eurasian Siskin | Dornbirn (V)            | 28.09.2020 | x           | emaciated         | 10            | 0               | PCR                 | ND                 | ND                          |

UA = Upper Austria; St = Styria; B = Burgenland; LA = Lower Austria; V = Vorarlberg; C = Carinthia; S = Salzburg; T = Tyrol; F = female; M = male; A = adult; x = not recorded; g = gram; + = positive; 0 = no changes; ISH = *in situ* hybridization; PCR = polymerase chain reaction; ND = not done.
